# Supplementary material
Source: HighWire-hosted journal article supplement (http://www.annfammed.org/highwire/filestream/8856/field_highwire_adjunct_files/0/Smith_Supp_Apps.pdf)
Supplement: Smith_Supp_Apps.pdf [file Smith_Supp_Apps.pdf]

**Supplemental materials for:**

Smith SM, Wallace E, Salisbury C, Sasseville M, Bayliss E, Fortin M. A core outcome set for multimorbidity research (COSmm). *Ann Fam Med*. 2018;16(2):132-138.

## **Appendix 1. Multimorbidity workshops at which outcome measures discussed and provisional list formulated**

### *Multimorbidity Workshop*

Society for Academic Primary Care (SAPC), Annual Scientific Meeting 2011, Galway, Ireland  
Smith SM, Mercer S

### *Multimorbidity Workshop*

Department of General Practice, University of Glasgow, UK. April 2012  
Mercer S, Gunn J and Fortin M

### *Multimorbidity research frameworks.*

NAPCRG Annual Meeting 2012, New Orleans, USA

Compiled as research paper:

Smith SM, Bayliss EA, Mercer SW, Gunn J, Vestergaard M, Wyke S, Salisbury C, Fortin M. How to design and evaluate interventions to improve outcomes for patients with multimorbidity. *Journal of Comorbidity*. 2013;3:10-17.

### *Multimorbidity Workshop*

Cochrane Collaboration Symposium 2013, Montreal, Canada  
SM Smith, C Boyd, M Fortin

### *Designing interventions For Multimorbidity in Primary Care*

AHRQ MCC Research Network Webinar 2013, co-ordinated by Dr J Fraser and Prof L Bayliss

Smith SM, Fortin M, Vestergaard M, Mercer S, Gunn J, and Salisbury C

### *Think-Tank on Outcomes for Patient-Centered Interventions for Persons with*

*Multimorbidity*. Fortin M, Stewart M., Bayliss E., Sasseville M., Little P., Mercer S., Furler J. NAPCRG Annual Meeting 2015, Cancun, Mexique.

## 1. Introduction

The COMET (Core Outcome Measures in Effectiveness Trials) is a new initiative which aims to develop agreed standardised sets of outcomes, known as 'core outcome sets' (COS) (<http://www.comet-initiative.org/>). These sets represent the minimum that should be measured and reported in all clinical trials of a specific condition or conditions, and are also suitable for use in clinical audit or research other than randomised trials. The existence or use of a core outcome set is not intended to restrict the use of other outcomes but the collection and reporting of a set of core outcomes will simplify trial comparison and combination for the purposes of systematic reviews in this area.

### Aim and objectives

The aim of this study is to undertake a Delphi process using an international panel of experts to formalise an agreed core outcome set for multimorbidity research studies.

The specific objectives of the proposed study are:

1. To develop an explicit list of multimorbidity outcomes for intervention studies
2. To validate these outcomes using a Delphi validation technique

If you choose to participate, you will be asked to be a Delphi Panel member and complete a simple online questionnaire. This will involve rating your level of agreement, on a five-point scale, with a series of statements about potential outcomes for multimorbidity studies. The initial list of all potential indicators has been drawn from existing literature in the area. After the first round of the survey, the research team will bring together all of the results and then present this back to the Delphi Panel members for a second round and they have an opportunity to review their first decision and amend it if they want to. We estimate this will take about 30-45 minutes for each round and can be completed anywhere that you have internet access.

There will be approximately six weeks between the two rounds to give everyone a chance to reply and to allow the research team to analyse the first round results.

### Appendix 3: COSmm Stakeholder Group (Delphi panel members)

| Name and Position               | Discipline                                              | Location                                                                             |
|---------------------------------|---------------------------------------------------------|--------------------------------------------------------------------------------------|
| Prof Stewart Mercer             | General Practice                                        | University of Glasgow, Scotland                                                      |
| Prof Frances Mair               | General Practice                                        | University of Glasgow, Scotland                                                      |
| Prof Bruce Guthrie              | General Practice, Lead, NICE Guidance on Multimorbidity | University of Dundee, Scotland                                                       |
| Prof Peter Bower                | Primary Care                                            | University of Manchester, UK                                                         |
| Prof Cynthia Boyd               | Gerontology                                             | Johns Hopkins University School of Medicine, Baltimore, USA                          |
| Prof Jane Gunn                  | General Practice                                        | University of Melbourne, Australia                                                   |
| Prof Marjan van den Akker       | Epidemiology                                            | Maastricht University, Maastricht, The Netherlands                                   |
| Dr Christianne Muth             | General Practice                                        | Institute of General Practice, Johann Wolfgang Goethe University, Frankfurt, Germany |
| Prof Carmel Hughes              | Pharmacy                                                | School of Pharmacy, Queens University, Belfast, UK                                   |
| Prof Deirdre Connolly           | Occupational Therapy                                    | Head of Occupational Therapy, Trinity College, Dublin, Ireland                       |
| Prof Rafael Perera              | Methodology                                             | University of Oxford, UK                                                             |
| Prof Allesandra Merengoni       | Gerontology                                             | University of Brescia, Italy                                                         |
| Prof Chris Harrison             | Psychology                                              | University of Sydney, Australia                                                      |
| Prof John Furler                | General Practice                                        | University of Melbourne, Australia                                                   |
| Prof Jenny Ploeg                | Nursing                                                 | McMaster University, Canada                                                          |
| Prof Walter P Wodchis           | Health economist                                        | University of Toronto, Canada                                                        |
| Prof Amaia Calderon             | Ageing Research                                         | Karolinska Institute, Sweden                                                         |
| Prof. Matthew Maciejewski       | Health Economics                                        | Duke University, USA                                                                 |
| Assoc Prof. Donna Zulman        | General Internal Medicine                               | Stanford University, USA                                                             |
| Prof Anna Karin Welmer          | Physiotherapy                                           | Karolinska Institute, Sweden                                                         |
| Ms Sandra Cox                   | Journal editor                                          | Journal of Co-morbidity                                                              |
| Patient/ public representatives |                                                         | Ireland: Ms Sheila Barrett<br>UK: Ms Mandie Lewis                                    |

|  |                                                                                          |
|--|------------------------------------------------------------------------------------------|
|  | Canada: Ms Catherine Hofstetter.<br>Canada: Ms Maureen Smith<br>Canada: Ms Anne Lyddiatt |
|--|------------------------------------------------------------------------------------------|

**Table 4. Appendix: Potential outcomes measures for multimorbidity core outcome domains**

| <b>Included COS domains</b> | <b>Outcome measures for the domain (ref);</b>                         | <b>Number of respondents suggesting the measure</b> |
|-----------------------------|-----------------------------------------------------------------------|-----------------------------------------------------|
| HRQoL                       | EuroQol 5-Dimension (EQ-5D)                                           | 20                                                  |
|                             | Health Survey (SF-12 ( Short Form), SF-36)                            | 19                                                  |
|                             | Global quality of life (WHOQOL-BREF)                                  | 17                                                  |
|                             | Assessment of Quality of Life (AQoL 8)                                | 8                                                   |
|                             |                                                                       |                                                     |
| Mental Health               | Beck Depression Inventory (BDI)                                       | 9                                                   |
|                             | Patient Health Questionnaire Depression (PHQ9)                        | 16                                                  |
|                             | Hospital Anxiety and Depression Scale (HADS)                          | 9                                                   |
|                             | Geriatric depression scale (GDS)                                      | 12                                                  |
|                             | Center for Epidemiological Studies Depression (CES-D)                 | 11                                                  |
|                             | Symptom Checklist depression scale (SCL-20)                           | 6                                                   |
|                             | Beck Anxiety Inventory (BAI)                                          | 5                                                   |
|                             | Generalized Anxiety Disorder scale (GAD-7)                            | 10                                                  |
|                             | Cognitive symptom management score                                    | 8                                                   |
|                             | Montgomery–Åsberg Depression Rating Scale (MADRS)                     | 2                                                   |
|                             |                                                                       |                                                     |
|                             |                                                                       |                                                     |
| Mortality                   | Not applicable                                                        |                                                     |
| ADL                         | Frenchay Activities Index (FAI)                                       | 10                                                  |
|                             | Nottingham Extended Activities of Daily Living (NEADL)                | 11                                                  |
|                             | Instructions for Activities of Daily Living questionnaire (ADL/ IADL) | 19                                                  |
|                             | PROMIS Physical Function                                              | 2                                                   |
|                             |                                                                       |                                                     |
| Physical Function           | Sheehan Disability scale                                              | 13                                                  |
|                             | Sherbrooke Postal Q                                                   | 11                                                  |
| Self Rated Health           | Self-rated health (single question)                                   | 22                                                  |
|                             | Health distress score                                                 | 6                                                   |
|                             | Total unhealthy days                                                  | 2                                                   |
|                             | Health Assessment Questionnaire (HAQ)                                 | 6                                                   |
| Treatment Burden            | Burden Of Treatment Questionnaire (TBQ or TRAN)                       | 17                                                  |
|                             | Number drugs                                                          | 16                                                  |
|                             |                                                                       | 3                                                   |

|                           |                                                                              |    |
|---------------------------|------------------------------------------------------------------------------|----|
|                           | Patient experience with treatment scale (PETS)                               |    |
| Communication             | CARE                                                                         | 11 |
|                           | Communication with physicians score                                          | 8  |
| Healthcare Utilization    | Provider visits                                                              | 22 |
|                           | All cause emergency admissions                                               | 18 |
|                           | ACS admissions                                                               | 14 |
|                           | Emergency Department visits                                                  | 19 |
|                           | Emergency re-admissions                                                      | 14 |
|                           | Length hospital stay                                                         | 19 |
| Costs                     | Health and social service utilization survey                                 | 15 |
| Economic Analysis         | Cost per QALY                                                                | 9  |
| Adherence                 | Medication Event Monitoring System (MEMs)                                    | 8  |
|                           | Medication Adherence Rating Scale MARs                                       | 11 |
|                           | Edward scale                                                                 | 1  |
|                           | Mean daily medication use/ % medications taken                               | 8  |
| Shared decision making    | Healthcare Communication Questionnaire (HCCQ) [1];                           | 15 |
| Patient Enablement        | Patient Enablement Instrument (PEI) [2];                                     | 14 |
| Quality healthcare        | Patient measures quality of care provided by healthcare provider (PACIC) [3] | 14 |
|                           | Picker patient experience questionnaire (X);                                 | 7  |
|                           | Clinical quality indicators                                                  | 6  |
| Prioritization            | Goal Attainment Scale [4] [5]                                                | 11 |
|                           | Measures of patient preference LTC6 measure [6]                              | 14 |
| Self-management Behaviour | Health Education Impact Questionnaire (HEIQ) [7]                             | 12 |
|                           | Multilevel support for healthy lifestyles (CIRS) [8]                         | 10 |
|                           | PAM - patient activation measure (X)                                         | 3  |
| Self-Efficacy             | Self-efficacy score [9]                                                      | 18 |
| Physical Activity         | Walking/aerobic exer: mins/week                                              | 10 |
|                           | Daily PA logs                                                                | 11 |
|                           | International Physical Activity Questionnaire (IPAQ) [12]                    | 8  |

#### References for Appendix 4

1. Gremigni, P., M. Sommaruga, and M. Peltenburg, *Validation of the Health Care Communication Questionnaire (HCCQ) to measure outpatients' experience of communication with hospital staff*. Patient education and counseling, 2008. **71**(1): p. 57-64.
2. Howie, J., et al., *A comparison of a Patient Enablement Instrument (PEI) against two established satisfaction scales as an outcome measure of primary care consultations*. Family Practice, 1998. **15**(2): p. 165-171.
3. Glasgow, R.E., et al., *Development and validation of the patient assessment of chronic illness care (PACIC)*. Medical care, 2005. **43**(5): p. 436-444.
4. Kiresuk, T.J., A. Smith, and J.E. Cardillo, *Goal attainment scaling: Applications, theory, and measurement*. 2014: Psychology Press.
5. Kloseck, M., *The use of Goal Attainment Scaling in a community health promotion initiative with seniors*. BMC geriatrics, 2007. **7**(1): p. 1.
6. Person-centred care resource centre, *LTC6 Questionnaire*. 2013: The health foundation.
7. Osborne, R.H., G.R. Elsworth, and K. Whitfield, *The Health Education Impact Questionnaire (heiQ): an outcomes and evaluation measure for patient education and self-management interventions for people with chronic conditions*. Patient education and counseling, 2007. **66**(2): p. 192-201.
8. Glasgow, R.E., et al., *The Chronic Illness Resources Survey: cross-validation and sensitivity to intervention*. Health Education Research, 2005. **20**(4): p. 402-409.
9. Lorig, K., et al., *Effect of a self-management program on patients with chronic disease*. Eff Clin Pract, 2001. **6**: p. 256 - 262.
10. Lorig, K., *Outcome measures for health education and other health care interventions*. 1996: Sage.
11. Vaglio, J., et al., *Testing the performance of the ENRICH Social Support Instrument in cardiac patients*. Health and Quality of Life Outcomes, 2004. **2**: p. 24-24.
12. Booth, M., *Assessment of physical activity: an international perspective*. Research quarterly for exercise and sport, 2000. **71**(sup2): p. 114-120.
13. Hudon, C., et al., *Measuring Patients' Perceptions of Patient-Centered Care: A Systematic Review of Tools for Family Medicine*. Annals of Family Medicine, 2011. **9**(2): p. 155-164.
14. Al-Janabi, H., J. Coast, and T.N. Flynn, *What do people value when they provide unpaid care for an older person? A meta-ethnography with interview follow-up*. Social Science & Medicine, 2008. **67**(1): p. 111-121.
15. Reeves, M.M., E.A. Winkler, and E.G. Eakin, *Fat and Fibre Behaviour Questionnaire: Reliability, relative validity and responsiveness to change in Australian adults with type 2 diabetes and/or hypertension*. Nutrition & Dietetics, 2015. **72**(4): p. 368-376.



16. Gibbons, C.J., et al., *Development of a multimorbidity illness perceptions scale (MULTIPIeS)*. PloS one, 2013. **8**(12): p. e81852.
17. Broadbent, E., et al., *The brief illness perception questionnaire*. Journal of psychosomatic research, 2006. **60**(6): p. 631-637.
